# Supplementary material
Source: publisher site journal article supplement (https://www.dovepress.com/article/supplementary_file/560342/560342%20Supplementary%20Material.docx)
Supplement: Supplementary file 1 [file 560342%20Supplementary%20Material.docx]

**Supplementary table 1:** Search strategy for different databases.

| **Pubmed** | (("Exercise Test"[Mesh] OR "exercise test*"[tiab] OR CPET[tiab]) AND ("Pulmonary Disease, Chronic Obstructive"[Mesh] OR COPD[tiab] OR "Chronic obstructive pulmonary disease"[tiab]) ) AND ( Cohort Studies[Mesh] OR incidence[tw] OR Mortality[Mesh] OR Follow-Up Studies[Mesh] OR course[tw] OR Survival Analysis[Mesh] OR prognos*[tw] OR predict*[tw]) |
| --- | --- |
| **Embase** | ('exercise test'/exp OR 'exercise test*':ti,ab OR cpet:ti,ab) AND ('chronic obstructive lung disease'/exp OR copd:ti,ab OR 'chronic obstructive pulmonary disease':ti,ab) AND ('cohort analysis'/exp OR incidence:ti,ab OR 'mortality'/exp OR 'follow up'/exp OR course:ti,ab OR 'survival analysis'/exp OR prognos*:ti,ab OR predict*:ti,ab) |
| **Web of Science** | ("exercise test*" OR CPET (All Fields)) AND ("Chronic Obstructive Pulmonary Disease" OR COPD OR "Pulmonary Disease, Chronic Obstructive" (All Fields)) AND ("cohort study" OR incidence OR mortality OR "follow-up study" OR course OR "survival analysis" OR prognos* OR predict*) |
| **Cochrane library** | ("exercise test*" OR CPET) AND ("Chronic Obstructive Pulmonary Disease" OR COPD OR "Pulmonary Disease, Chronic Obstructive") AND ("cohort study" OR incidence OR mortality OR "follow-up study" OR course OR "survival analysis" OR prognos* OR predict*) |
| **Scopus** | TITLE-ABS-KEY("exercise test*" OR CPET) AND TITLE-ABS-KEY("Chronic Obstructive Pulmonary Disease" OR COPD) AND TITLE-ABS-KEY("cohort study" OR incidence OR mortality OR "follow-up study" OR course OR "survival analysis" OR prognos* OR predict*) |

Search fields included title and abstract (ti, ab), text words (tw), and author keywords, as appropriate for each database. In Scopus, searches were limited to the title, abstract, and author keywords (TITLE-ABS-KEY). Truncation (*) was used to capture word variants.
